1 **Asparagine deprivation causes a reversible inhibition of Human Cytomegalovirus acute**  
2 **virus replication**

3

4 *Chen-Hsuin Lee<sup>1</sup>, Samantha Griffiths<sup>2</sup>, Paul Digard<sup>1</sup>, Nhan T. Pham<sup>3</sup>, Manfred Auer<sup>3</sup>,*

5 *Juergen Haas<sup>2</sup>, Finn Grey<sup>1</sup>*

6

7 1. Division of Infection and Immunity, The Roslin Institute, University of Edinburgh, Easter  
8 Bush, Midlothian, UK.

9 2. Division of Infection and Pathway Medicine, University of Edinburgh, Edinburgh, UK.

10 3. MRC Centre for Regenerative Medicine, Institute for Stem Cell Research, School of  
11 Biological Sciences, The University of Edinburgh, Edinburgh EH16 4UU, UK.

12

13 **Abstract**

14 As obligate intracellular pathogens, viruses rely on the host cell machinery to replicate  
15 efficiently, with the host metabolism extensively manipulated for this purpose. High  
16 throughput siRNA screens provide a systematic approach for the identification of novel host-  
17 virus interactions. Here, we report a large-scale screen for host factors important for human  
18 cytomegalovirus (HCMV), consisting of 6,881 siRNAs. We identified 47 proviral factors and  
19 68 antiviral factors involved in a wide range of cellular processes including the mediator  
20 complex, proteasome function and mRNA splicing. Focused characterisation of one of the hits,  
21 asparagine synthetase (ASNS), demonstrated a strict requirement for asparagine for HCMV  
22 replication which leads to an early block in virus replication before the onset of DNA  
23 amplification. This effect is specific to HCMV, as knockdown of ASNS had little effect on  
24 herpes simplex virus-1 or influenza A virus replication, suggesting the restriction is not simply  
25 due to a failure in protein production. Remarkably, virus replication could be completely  
26 rescued seven days post-infection with addition of exogenous asparagine, indicating that while  
27 virus replication is restricted at an early stage, it maintains the capacity for full replication days  
28 after initial infection. This study represents the most comprehensive siRNA screen for the  
29 identification of host factors involved in HCMV replication and identifies the non-essential

30 amino acid, asparagine as a critical factor in regulating HCMV virus replication. These results  
31 have implications for control of viral latency and the clinical treatment of HCMV in patients.

## 32 **Importance**

33 HCMV accounts for more than 60% of complications associated with solid organ transplant  
34 patients. Prophylactic or preventative treatment with antivirals, such as ganciclovir, reduces  
35 the occurrence of early onset HCMV disease. However, late onset disease remains a significant  
36 problem and prolonged treatment, especially in patients with suppressed immune systems,  
37 greatly increases the risk of antiviral resistance. Very few antivirals have been developed for  
38 use against HCMV since the licensing of ganciclovir, and of these, the same viral genes are  
39 often targeted, reducing the usefulness of these drugs against resistant strains. An alternative  
40 approach is to target host genes essential for virus replication. Here we demonstrate that HCMV  
41 replication is highly dependent on levels of the amino acid asparagine and knockdown of a  
42 critical enzyme involved in asparagine synthesis results in severe attenuation of virus  
43 replication. These results suggest that reducing asparagine levels through dietary restriction or  
44 chemotherapeutic treatment could limit HCMV replication in patients.

45

## 46 **Introduction**

47 Human cytomegalovirus (HCMV) is a highly prevalent herpesvirus, infecting greater than 30%  
48 of the worldwide population. Although normally asymptomatic in healthy individuals, HCMV  
49 infection is a significant cause of morbidity and mortality in immunocompromised populations,  
50 individuals with heart disease and recipients of solid organ and bone marrow transplants (1).  
51 HCMV is also the leading cause of infectious congenital birth defects resulting from spread of  
52 the virus to neonates (2).

53 Cellular metabolism is a tightly regulated process in mammalian cells and is often manipulated  
54 during viral infection. As obligate intracellular pathogens, viruses rely on host metabolites and  
55 often alter host metabolism to increase pools of free nucleotides and amino acids, as well as  
56 inducing fatty acid biosynthesis to aid efficient virus replication (3, 4).

57 Infection with HCMV has been demonstrated to alter the host cell metabolic pathways,  
58 increasing glycolysis and glutamine metabolism while maintaining protein translation through  
59 activation of mammalian target of rapamycin complex 1 (mTORC1) (5). Glucose metabolism  
60 is a key pathway to supply carbon precursors for cellular biosynthesis and energy production.

61 Under normal conditions, glucose is used for energy generation and cellular biosynthesis whilst  
62 only a small amount of glutamine is metabolised from exogenous sources. In contrast, in  
63 HCMV infected cells, glucose is diverted away from TCA cycle, into the production of lactic  
64 acid and fatty acid, while exogenous glutamine is used as the main carbon and nitrogen source.  
65 Glutamine can donate its amino group at the gamma position for *de novo* biosynthesis of  
66 nucleotides and non-essential amino acids whilst being converted to glutamate (6). Glutamate  
67 can be further metabolised into  $\alpha$ -ketoglutarate via glutamate dehydrogenase, thereby  
68 providing a key intermediate for the TCA cycle, a process known as anaplerosis, which also  
69 occurs in rapidly dividing cancer cells (7).

70 A recent study showed that infection with HCMV results in increased metabolism of arginine,  
71 leucine/isoleucine, serine and valine and increased secretion of alanine, ornithine and proline,  
72 demonstrating extensive alteration of cellular amino acid metabolism during infection (8).  
73 Furthermore, HCMV manipulates cellular signalling pathways to maintain protein synthesis  
74 during amino acid starvation. Mammalian cells have two main pathways that monitor and  
75 modulate the level of intracellular amino acids: mTOR and the amino acid response (AAR)  
76 pathway. The mTOR pathway serves to ensure a sufficient level of amino acids to support  
77 protein synthesis and cell growth. Previous studies have shown that glutamine and leucine  
78 activate the mTOR pathway via glutaminolysis and mediate cellular responses to amino acids  
79 (9). Activation of mTOR ultimately leads to the phosphorylation and activation of the  
80 ribosome-associated S6 kinase, which enables higher levels of protein synthesis, while loss of  
81 mTOR signalling results in suppression of protein synthesis. However, HCMV infection can  
82 maintain mTOR activation during amino acid deprivation, through the viral UL38 protein  
83 binding and antagonising the tuberous sclerosis subunit complex 2 (TSC2), a major suppressor  
84 of mTOR (10). UL38 interaction with TSC2 has also been shown to have broader effects on  
85 cellular metabolism in an mTOR independent fashion (8). These findings show that regulation  
86 of amino acid metabolism plays an important role during HCMV replication.

87 Here, we show that asparagine synthetase (ASNS) is a critical host factor for HCMV replication  
88 following a comprehensive siRNA screen. Knockdown of ASNS resulted in an early restriction  
89 in virus replication. However, knockdown of ASNS had little effect on Herpes Simplex Virus-  
90 1 (HSV-1) or influenza A virus (IAV) replication, indicating the effects of asparagine depletion  
91 was specific to HCMV and not simply due to a loss of production of asparagine-containing  
92 proteins. Furthermore, mTOR activation was maintained in infected cells following ASNS

93 knockdown, indicating that this was not the cause of attenuated virus replication. Remarkably,  
94 the block in viral replication could be completely rescued seven days post-infection with the  
95 addition of exogenous asparagine to the cell media. These results suggest a novel check point  
96 in virus replication regulated by intracellular asparagine levels.

## 97 **Results**

### 98 ***High-throughput siRNA screen identified novel host factors involved in HCMV replication.***

99 To identify host factors that influence HCMV replication, a combined siRNA library  
100 comprising small interfering RNAs (siRNAs) targeting the human druggable genome, protein  
101 kinases/phosphatases and cell cycle genes, were used in a high-throughput screen.  
102 SMARTpool siRNAs (a pool of 4 siRNAs per gene) targeting a total of 6,881 genes were  
103 transfected into primary normal human dermal fibroblast (NHDF) cells in a 384 well format.  
104 Cells were infected at 48 hours post-transfection at a high multiplicity of infection (MOI = 5)  
105 with the low-passage HCMV strain TB40/E-GFP, which expresses green fluorescent protein  
106 (GFP) from a simian virus 40 (SV40) promoter (11). GFP fluorescence levels were monitored  
107 every 24 hours for seven days, with levels compared to control non-targeting siRNA  
108 transfected cells in order to determine the effect of individual gene depletion on HCMV  
109 replication. We have previously established GFP expression as an accurate measure of early  
110 virus replication events including viral entry, translocation to the nucleus and viral DNA  
111 amplification, hereon referred to as primary replication (12, 13). The assay was performed in  
112 biological triplicate with an additional replicate used to determine cytotoxicity at seven days  
113 post-infection (DPI) (supplemental table 1). siRNAs were defined as cytotoxic when gene  
114 depletion led to greater than 40% cell death (106 in total; data not shown). These genes were  
115 excluded from further analyses. High correlation between biological triplicates demonstrated  
116 reproducibility within the screen (**Figure 1A**). The screen identified a total of 115 host factors  
117 where knockdown led to 50% inhibition (47 proviral factors) or 50% increase (68 antiviral  
118 factors) in primary replication (**Figure 1B and C, supplemental table 2 and 3**). Figure 2  
119 shows a schematic summary of the top hits affecting HCMV virus replication grouped into  
120 functionally related gene clusters based on STRING analysis (14). These include members of  
121 the proteasome complex and ubiquitin modifying factors, which have previously been shown  
122 to be important for efficient HCMV replication and the mediator complex that has been linked  
123 to immediate early transactivator function in alpha and gamma herpesviruses (15-19). mRNA  
124 splicing factors, transcription and translation initiation factors and DNA replication factors are

125 also identified as proviral. Interestingly, a number of histone modification factors are identified  
126 as antiviral, along with multiple signal transduction factors, developmental, cell adhesion and  
127 cellular response to signalling factors. Based on the magnitude of phenotype, lack of toxicity  
128 and novelty, nine host factors with proviral phenotypes were selected for further validation  
129 (**Table 1**).

130 To determine whether the observed effects on virus replication were specific to the knockdown  
131 of the identified gene and not due to artefactual off-target effects, the pools of siRNAs were  
132 deconvoluted and each of the individual siRNAs tested for their effect on virus replication,  
133 along with the original pool of siRNAs (**Table 1**). All pooled siRNAs recapitulated the  
134 phenotype in the primary screen, once again confirming reproducibility of the assay. In eight  
135 out of nine cases, at least 3 of 4 siRNAs from the original pools demonstrated similar  
136 phenotypic effects, strongly suggesting attenuation of primary replication was due to  
137 knockdown of the target host factor rather than off-target effects. Asparagine synthetase  
138 (ASNS) was selected for further detailed characterisation as knockdown resulted in a  
139 substantial reduction in primary replication based on GFP expression, and has not previously  
140 been associated with HCMV or herpesviruses in general.

141 ***ASNS is a crucial host factor for HCMV replication.***

142 ASNS is the sole enzyme that catalyses the biosynthesis of asparagine, by transferring the  
143 gamma amino group from glutamine to aspartate in an ATP-dependent manner. In the high  
144 throughput screen, knockdown of ASNS inhibited HCMV primary replication, based on GFP  
145 expression, throughout the course of a single cycle infection (**Figure 3A**). Inhibition was not  
146 due to siRNA cytotoxicity, as measured by CellTiter-Blue cytotoxicity assay (**Figure 3B**), with  
147 cell viability increased following ASNS knockdown in infected cells compared to control  
148 transfected cells, possibly due to the inhibition of HCMV replication and subsequent decrease  
149 in cytopathic effect in infected cells.

150 To confirm reduced GFP expression levels corresponded to reduced virus production, single-  
151 step growth curves were performed following knockdown of ASNS. Supernatant and cell-  
152 associated virus levels were determined following a high multiplicity infection (MOI = 5) by  
153 plaque assay. In both pools, knockdown of ASNS resulted in a substantial decrease in virus  
154 production compared to control non-targeting siRNA transfected cells, confirming the original  
155 observation based on GFP expression (**Figure 3C**).

156 In order to confirm the observed phenotype was due to specific protein knockdown and not due  
157 to off-target effects, we performed individual siRNA knockdown with 4 separate siRNAs from  
158 the pool. Three out of four siRNAs against ASNS showed the same phenotype as the  
159 reconstituted siRNA pool, whereas siRNA #1 showed no inhibition of primary replication  
160 (**Figure 3D**). Western blot analysis with protein lysates collected at 96 hours post-infection  
161 (HPI) revealed that siRNA #1 was less efficient at knocking down the protein, demonstrating  
162 a direct correlation between siRNA efficacy and attenuation of virus replication (**Figure 3E**),  
163 confirming that the observed phenotype was due to specific knockdown of ASNS and not off-  
164 target effects.

### 165 *ASNS knockdown inhibits HCMV IE2 and subsequent gene expression.*

166 To determine where in the virus lifecycle ASNS knockdown restricts virus replication, the  
167 associated phenotype was characterised in more detail. Knockdown of ASNS did not  
168 significantly affect viral entry or translocation of the genome to the nucleus as the number of  
169 GFP positive cells were equivalent between ASNS knockdown and control transfected cells at  
170 24 hours post infection (**Figure 4A**). Thereafter, we investigated the role of ASNS in HCMV  
171 gene expression in more detail. HCMV gene expression occurs in a temporal manner, with  
172 immediate-early (IE), early (E) and late (L) gene expression phases. In order to identify the  
173 stage of the HCMV life cycle ASNS was involved in, we qualitatively measured the expression  
174 of IE (IE1/2), E (pp52) and L (pp28) genes by western blot analysis following knockdown of  
175 ASNS (**Figure 4B & 4C**). Following ASNS knockdown, IE1 expression was not drastically  
176 affected compared to the control non-targeting transfected cells. However, IE2 expression was  
177 substantially reduced, with subsequent E and L gene expression reduced to below the level of  
178 detection. Unsurprisingly, viral DNA levels were also significantly reduced following ASNS  
179 knockdown (**Figure 4D**). These results indicate that knockdown of ASNS results in an early  
180 phenotype with inhibition of virus replication occurring after viral entry and translocation to  
181 the nucleus, but before IE2 gene expression and viral DNA amplification.

### 182 *Inhibition of HCMV replication is not due to a general loss of protein translation*

183 As standard growth media does not contain asparagine, NHDF cells are dependent on ASNS  
184 for generation of *de novo* asparagine. Knockdown of ASNS would therefore be predicted to  
185 lead to asparagine depletion over time, ultimately impacting translation of proteins containing  
186 asparagine. However, the relatively early phenotype observed and the fact that IE1 protein

187 expression levels were not dramatically affected, while IE2 expression levels were  
188 substantially reduced, suggests that the effect on HCMV replication following ASNS  
189 knockdown may not be due to a general loss of protein translation caused by asparagine  
190 deprivation. To directly measure protein translation levels in infected cells following ASNS  
191 knockdown, puromycin pulse studies were performed. Cells were transfected with siRNA  
192 against ASNS or a negative control siRNA and infected with TB40E-GFP at an MOI of five,  
193 two days post transfection. Puromycin was added at zero (time of infection), four and seven  
194 days post infection (DPI) for fifteen minutes, before total proteins were harvested. Global  
195 translation levels were measured by western blot analysis using a puromycin specific antibody.  
196 In addition to general labelling of proteins, a strong band was detected at approximately 24  
197 kDa that is substantially reduced in the ASNS knockdown cells (**Figure 5A**). Currently the  
198 identity and relevance of this protein is not known, however experiments are ongoing to  
199 identify the protein and determine whether it plays a direct role in ASNS dependant HCMV  
200 replication. To avoid skewing the analysis, this band was omitted from the quantification  
201 analysis. Other than this band, the results show that relative protein translation levels were not  
202 reduced following ASNS knockdown in infected cells (**Figure 5A and 5B**). This suggests that  
203 inhibition of HCMV replication from ASNS knockdown is not simply due to reduced protein  
204 translation due to the loss of available asparagine, but rather the virus is responding in a more  
205 indirect way to asparagine levels within the cell. Furthermore, knockdown of ASNS does not  
206 reduce replication of the related herpes simplex virus-1 (HSV-1) or influenza A virus (IAV).  
207 Following knockdown of ASNS, primary human fibroblast cells were infected with HSV-1  
208 (strain C12) or IAV (strain A/PR/8/34 [PR8]) at 48 hours post-transfection (**Figure 5C and**  
209 **D**). In contrast to HCMV, HSV-1 and IAV replication were not significantly reduced,  
210 indicating the cells are still capable of supporting robust virus replication and the effect of  
211 ASNS knockdown is specific to HCMV.

#### 212 ***Knockdown of ASNS did not inhibit mTOR activity during HCMV replication.***

213 As a reduction in protein translation does not appear to explain the inhibition of HCMV  
214 replication following ASNS knockdown, asparagine levels may lead to an indirect inhibition  
215 of HCMV virus replication through signalling pathways that monitor amino acid levels. While  
216 previous studies have shown that HCMV can override cellular signals that would normally  
217 inhibit mTOR activation due to deprivation of essential amino acids, the effect of deprivation  
218 of non-essential amino acids has not been investigated. Asparagine has recently been shown to

219 function as an amino acid exchange factor and an indirect regulator of mTOR signalling  
220 (**Figure 6A**) (20). We therefore investigated mTOR signalling in ASNS depleted cells during  
221 HCMV replication to determine whether depletion of the non-essential amino acid asparagine  
222 had an inhibitory effect on its activation. mTOR signalling was maintained upon ASNS  
223 knockdown, based on phosphorylation of ribosomal S6 kinase (S6K) which is the downstream  
224 effector of the mTOR complex (**Figure 6B**). This suggests that the inhibitory effect of HCMV  
225 primary replication caused by ASNS depletion was not due to a loss of mTOR activation.

### 226 *Addition of asparagine does not fully rescue glutamine deprivation.*

227 Previous studies have shown that infection with HCMV results in increased glutamine  
228 metabolism and glutamine starvation results in attenuation of virus replication (7). During  
229 infection, increased glutamine metabolism compensates for the diversion of glucose from the  
230 TCA cycle. However, glutamine is also required for the *de novo* synthesis of asparagine by  
231 ASNS (**Figure 6A**). A recent study demonstrated that addition of asparagine could rescue  
232 vaccinia virus replication following glutamine deprivation (21). Therefore, we investigated  
233 whether loss of asparagine synthesis contributes to inhibition of HCMV replication following  
234 glutamine deprivation. NHDF cells were infected with HCMV in overlay media that contained  
235 asparagine (N), glutamine (Q), both or neither. While addition of asparagine resulted in a  
236 modest rescue of GFP signal, the result indicates that loss of asparagine synthesis is a minor  
237 contributing factor to attenuation of virus replication through glutamine deprivation and loss  
238 of precursors for the TCA cycle likely represents the major contributing factor (**Figure 7**).

### 239 *Asparagine depletion causes a reversible restriction of HCMV acute replication.*

240 Asparagine (Asn, or N) is a non-essential amino acid, meaning it can be produced  
241 enzymatically from precursors within cells. The primary fibroblast cells in this study are  
242 cultured in media that does not contain asparagine, leaving the cells dependent on this  
243 biosynthetic pathway. To determine whether the HCMV phenotype observed following ASNS  
244 knockdown was entirely dependent on asparagine deprivation, cells were incubated in media  
245 supplemented with 0.1M asparagine two days prior to infection or at the time of infection and  
246 maintained throughout the time course. The results show that supplementation with asparagine  
247 completely rescued the virus growth phenotype based on GFP reporter expression levels  
248 (**Figure 8A**). This result indicates that the phenotype caused by knockdown of ASNS is due to  
249 a loss of available asparagine within the cell.



250 As supplementation of asparagine was shown to fully rescue primary replication when added  
251 at the time of infection, we wanted to determine whether primary replication could be rescued  
252 following extended knockdown of ASNS, when primary replication had stalled for multiple  
253 days. Remarkably, full primary replication could be initiated up to seven DPI in ASNS  
254 knockdown cells with addition of asparagine, indicating that while virus replication had stalled,  
255 infected cells remained viable and the virus was maintained in a state whereby primary  
256 replication could be efficiently reinitiated (**Figure 8B**). By seven DPI, primary replication  
257 began to recover without the addition of asparagine to the media, likely due to loss of siRNA  
258 mediated ASNS knockdown. These results indicate that acute HCMV replication is highly  
259 dependent on cellular asparagine levels and deprivation results in inhibition of the replication  
260 cycle, prior to DNA amplification and IE2 expression. However, the virus maintains the ability  
261 to resume virus replication when asparagine is supplied and reaches peak levels of replication  
262 based on GFP reporter gene expression, even following prolonged conditions of asparagine  
263 deprivation.

## 264 **Discussion**

265 Identification and characterisation of novel host-virus interactions provide valuable insights  
266 into how viruses replicate, can inform about the functions of basic cell biology and potentially  
267 identify targets for antiviral interventions. Using a high-throughput siRNA screen targeting  
268 6,881 genes, we identified multiple host factors important for HCMV replication, including  
269 ASNS, and demonstrate that the non-essential amino acid asparagine is required for HCMV  
270 replication at an early stage. Despite ASNS knockdown, global proteins translation levels were  
271 maintained. Furthermore, given the block in virus replication occurs relatively early in infection  
272 and knockdown cells could still fully support replication of HSV-1 and IAV, suggests the loss  
273 of replication is not simply due to loss of protein production, but rather indicates asparagine  
274 levels feed into a signalling pathway that influences replication of HCMV. While asparagine  
275 depletion had little effect on HSV-1 or IAV replication, a recent report demonstrated that, like  
276 HCMV, Vaccinia virus (VACV) is also highly dependent on asparagine levels and knockdown  
277 of ASNS resulted in attenuation of virus replication (21). Interestingly, despite the similar  
278 phenotype, there appears to be differences in the effects of asparagine depletion on the two  
279 viruses. For example, addition of asparagine can fully rescue attenuation of VACV following  
280 glutamine deprivation, indicating that increased glutamine metabolism in VACV infected cells  
281 is necessary for asparagine synthesis, rather than contributing precursors for the TCA cycle.

282 Furthermore, attenuation appears to be due to a loss of protein production in VACV infection  
283 cells. Therefore, while asparagine deprivation has similar effects on both viruses the  
284 mechanisms underlying asparagine requirement may be different between the viruses.

285 There is an increasing appreciation that amino acids are not just building blocks for protein  
286 production, but instead participate in many signalling pathways within a cell, affecting protein  
287 translation, cell cycle and even apoptosis (22-25). While mTOR is part of a major signalling  
288 pathway affected by amino acid levels, our data indicates that knockdown of ASNS in infected  
289 cells does not block HCMV activation of mTOR, therefore loss of mTOR signalling does not  
290 account for attenuation of virus replication.

291 Inactive ASNS has been shown to affect cell cycle (25). Infection with HCMV causes cell cycle  
292 arrest between G1 and S phase, and studies have shown that virus replication is blocked during  
293 other phases of cell cycle due to a failure in immediate early gene expression (26, 27). However,  
294 as loss of asparagine synthesis results in a block in cell cycle at the G1 phase, it is unlikely that  
295 alteration of cell cycle by ASNS knockdown explains the attenuation of virus replication.  
296 Further studies will be required to determine the precise mechanism by which asparagine  
297 deprivation results in HCMV attenuation and potential signalling pathways that may be  
298 involved.

299 HCMV infection remains an important clinical issue, both in immunocompromised individuals  
300 and during pregnancy, where spread of the virus to the foetus can lead to serious developmental  
301 pathologies. There is currently no effective vaccine and available antiviral therapies have  
302 significant issues, including side effects and development of resistance. The generation of new  
303 treatments against HCMV is therefore required. Very few antivirals have been developed for  
304 use against HCMV since the licensing of Ganciclovir and, of these, the same viral genes are  
305 often targeted, reducing the effectiveness of these drugs against resistant strains. An alternative  
306 strategy for the development of novel antivirals involves targeting of host genes or metabolites  
307 required by the virus for successful replication. Development of resistance against drugs that  
308 target host genes would be far more complex, as the virus would have to gain mutations that  
309 would compensate for the loss of a required cellular factor. In many cases such mutations may  
310 not exist. We have shown that reducing available asparagine levels has a profound inhibitory  
311 effect on HCMV replication, suggesting this may be a potential strategy for limiting HCMV  
312 replication in patients. A recent study demonstrated that reducing asparagine levels in mice  
313 through treatment with L-Asparaginase or through dietary restriction, reduced metastatic

314 spread of tumour cells (28). As discussed, tumour cells demonstrate metabolic alterations  
315 similar to HCMV infected cells, with increased anaplerosis and dependence on asparagine (7).  
316 While cells are able to make de novo asparagine through ASNS, this study suggests that in  
317 certain physiological conditions, cells still require free exogenous asparagine, especially cells  
318 with a high asparagine dependence. Therefore, reducing available asparagine levels through  
319 treatment with L-asparaginase or by dietary restriction may be an effective clinical approach  
320 for treating HCMV infection in high risk patients. Temporary dietary restriction would be a  
321 particularly attractive approach given the limited likelihood of serious side effects. While this  
322 approach would not eliminate the virus, as demonstrated by rescue of virus replication days  
323 later with exogenous asparagine, subduing virus replication in combination with other antiviral  
324 drugs may still be therapeutically beneficial.

325 Finally, it will be interesting to determine the potential impact of asparagine levels, and amino  
326 acid metabolism in general, on the establishment, maintenance and reactivation of HCMV  
327 during latency. ASNS expression levels are relatively low in many tissues in normal conditions.  
328 A recent paper reported effects on amino acid metabolism during acute HCMV replication in  
329 primary fibroblast cells and it is clear the virus modulates amino acid levels and metabolism,  
330 including induction of ASNS as we show here (8). ASNS expression and asparagine levels  
331 have been reported to respond to stress signalling and demonstrate tissue specific differences  
332 (29). Additional experiments are underway to characterise the reversible block in viral  
333 replication during asparagine deprivation, including viral gene expression and characterisation  
334 of the viral genome. It will be of interest to determine asparagine levels and levels of amino  
335 acids in general during models of HCMV latency and reactivation to determine whether there  
336 is any link between regulation of latency and amino acid metabolism.

## 337 **Materials and methods**

### 338 *Cell culture and virus infection*

339 Normal human dermal fibroblast (NHDF, Gibco) cells were maintained in Dulbecco's  
340 modified high glucose medium (DMEM, Sigma) supplemented with 10% foetal bovine serum  
341 (FBS, Gibco) and 1X penicillin-streptomycin-glutamine (Gibco). A low passage HCMV strain  
342 TB40/E-GFP, which is engineered to constitutively express GFP from an SV40 promoter at  
343 the intragenic region between TRS1 and US34, was obtained from F. Goodrum (11) and used  
344 for all experiments.

345 ***siRNA screening***

346 The Dharmacon SMARTpool human druggable genome (G-004600-05), cell cycle (G-003250-  
347 02) and protein kinase (G-003500-02) siRNA libraries against 6,881 gene targets were prepared  
348 in the 96-well format at the concentration of 3  $\mu$ M (diluted in Thermo Scientific siRNA buffer)  
349 at the Division of Infection and Pathway Medicine, University of Edinburgh, followed by the  
350 set-up of 384-well master plates at the concentration of 311 nM, using RapidPlate 384 liquid  
351 handling robot (QIAGEN). The complete protocol can be found in Virus Host Interactions  
352 Methods and Protocols (30). Low passage NHDF cell suspension (approx. passage 11) were  
353 reverse-transfected with siRNA and Lipofectamine RNAiMAX (Invitrogen) using MultiDrop  
354 384. At 48 hours post-transfection, media were removed and cells were infected with TB40/E-  
355 GFP at an MOI of 5. Relative GFP expression is measured by Cytation 3 cell imaging multi-  
356 mode microplate reader (BioTek) every 24 hours for 7 days.

357 ***Cell viability assay***

358 Two cell viability assays were performed at 7 days post-infection (DPI). Media in plates were  
359 removed and the CellTiter-Blue reagent with fresh media were added by MultiDrop 384.  
360 Following 1-4 hour incubation, the fluorescence at 560/590 nm was measured by Cytation 3  
361 cell microplate reader (BioTek). The relative cell viability was normalised to the reading of  
362 control non-targeting siRNA transfected cells.

363 ***Amino acid depletion and supplementation***

364 The DMEM (Gibco; D5796) used for normal cell culture contains a total of 0.876 g/L of L-  
365 glutamine and no L-asparagine. An alternative DMEM without L-glutamine (Gibco; D5030)  
366 was used to starve cells without L-glutamine and L-asparagine. In preparation of DMEM  
367 without L-glutamine, equal amount of sodium bicarbonate (3.7 g/L) and glucose (4.5 g/L) to  
368 DMEM (D5030) were added. For L-asparagine supplementation, 0.1 mM of L-asparagine was  
369 added, either in DMEM D5030 (to make -Q +N) or in DMEM D5796 (to make +Q +N).

370 ***Western blot analysis***

371 Following transfection, cells were harvested at 0 to 7 DPI in RIPA buffer containing protease  
372 and phosphatase inhibitor cocktails (Roche). Protein concentrations were determined by  
373 bicinchoninic acid (BCA) assay (Thermo Fisher) following the manufacturer's protocol.

374 Proteins were separated on 10% SDS-PAGE gels and transferred to nitrocellulose membranes  
375 by wet transfer (20% methanol). Membranes were blocked with 5% milk in Tris buffered saline  
376 (TBS) and probed with antibodies to HCMV IE1 and IE2 (Merck Millipore; MAB-8131;  
377 1/5000), pp52 (Santa Cruz Biotechnology; sc-56971; 1/1000), pp28 (Santa Cruz Biotechnology;  
378 sc-69749; 1/1000), ASNS (Proteintech; 14681-1-AP; 1/1000), p70 S6K (Cell Signalling  
379 Technology; 2708; 1/1000), phospho-Thr389 p70 S6K (Cell Signalling Technology; 9234;  
380 1/500), and  $\beta$ -actin (Abcam; ab8227; 1/2500). Secondary antibodies conjugated to horseradish  
381 peroxidase (HRP) (Thermo Fisher) or IR800 and IR680 dye (Li-Cor) were used and blots were  
382 imaged by Li-Cor Odyssey Fc imaging system. Quantification was done with Li-Cor Image  
383 Studio Lite software.

#### 384 *qPCR*

385 DNA was purified using a DNeasy Blood and Tissue kit (Qiagen) and quantified with a  
386 NanoDrop spectrophotometer. The SensiFAST SYBR Hi-ROX kit (Bioline United Kingdom,  
387 BIO-92020) and custom gene-specific primer sets were used to assay 20 ng DNA per reaction  
388 for HCMV gB (UL55) and GAPDH using the following primers: GAPDH DNA, 5'-  
389 GATGACATCAAGAAGGTGGTGA and 5'-CCTGCACTTTTAAAGAGCCAGT; HCMV  
390 gB (UL55), 5'-TAGCTACGACGAAACGTCAAAA and 5'-  
391 GGTACGGATCTTATTCGCTTTG. Results were normalised to GAPDH DNA levels and  
392 then to siNeg levels at 1 DPI by the  $\Delta\Delta C_T$  method.  $n = 2$ ; error bars represent standard error of  
393 the mean.

#### 394 *STRING analysis*

395 Functional annotation clustering was performed in the free software, Cytospace, with  
396 stringApp. The top 115 proviral and antiviral hits were analysed and only interactions with a  
397 confidence score of 0.8 or above were shown. To create the network view, each gene was  
398 assigned to the cluster with the highest enrichment where the gene was present in the highest  
399 fraction of individual clusters. For visualisation purposes, the interactions of a gene with  
400 multiple genes in the same cluster (such as the interactions of TAF1 with POLR2A, POLR2B  
401 and POLR2G) were removed. Genes that showed no interaction on the network were depicted  
402 in diamond shape. The effect of gene knockdown on relative GFP expression of virus  
403 replication was indicated in red (reduction) or green (enhancement) on the top right corner of  
404 the gene. The functional annotation clusters were arranged in their approximate cellular

405 locations in the final image. Some smaller annotation clusters and unconnected genes (43  
406 genes) were left out due to space limitation.

#### 407 ***Bioinformatics and statistical analysis***

408 siRNA screen data were analysed using Microsoft Excel and its data analytic tools. R studio  
409 was used to analyse the correlation between triplicate screens, using the *psych* package. Two-  
410 tailed homoscedastic Student's *t* test was applied to calculate the p-values of the effect of  
411 individual gene depletion on HCMV replication. n.s. =  $p > 0.05$ ; \* =  $p < 0.05$ ; \*\* =  $p < 0.005$ .

#### 412 **Acknowledgements**

413 This project is funded by MRC and the Principal's Career Development PhD scholarship by  
414 the University of Edinburgh. I'd like to thank Mrs Marie Craigon at the University of  
415 Edinburgh for her help with the liquid handling automated machine.

#### 416 **References**

- 417 1. Griffiths P, Baraniak I, Reeves M. 2015. The pathogenesis of human  
418 cytomegalovirus. *J Pathol* 235:288-97.
- 419 2. Goodrum F, Caviness K, Zagallo P. 2012. Human cytomegalovirus persistence. *Cell*  
420 *Microbiol* 14:644-55.
- 421 3. Sanchez EL, Lagunoff M. 2015. Viral activation of cellular metabolism. *Virology*  
422 479-480:609-18.
- 423 4. Munger J, Bennett BD, Parikh A, Feng XJ, McArdle J, Rabitz HA, Shenk T,  
424 Rabinowitz JD. 2008. Systems-level metabolic flux profiling identifies fatty acid  
425 synthesis as a target for antiviral therapy. *Nat Biotechnol* 26:1179-86.
- 426 5. Yu Y, Clippinger AJ, Alwine JC. 2011. Viral effects on metabolism: changes in  
427 glucose and glutamine utilization during human cytomegalovirus infection. *Trends*  
428 *Microbiol* 19:360-7.
- 429 6. Zhang J, Fan J, Venneti S, Cross JR, Takagi T, Bhinder B, Djaballah H, Kanai M,  
430 Cheng EH, Judkins AR, Pawel B, Baggs J, Cherry S, Rabinowitz JD, Thompson CB.

- 431 2014. Asparagine plays a critical role in regulating cellular adaptation to glutamine  
432 depletion. *Mol Cell* 56:205-218.
- 433 7. Chambers JW, Maguire TG, Alwine JC. 2010. Glutamine metabolism is essential for  
434 human cytomegalovirus infection. *J Virol* 84:1867-73.
- 435 8. Rodriguez-Sanchez I, Schafer XL, Monaghan M, Munger J. 2019. The Human  
436 Cytomegalovirus UL38 protein drives mTOR-independent metabolic flux  
437 reprogramming by inhibiting TSC2. *PLoS Pathog* 15:e1007569.
- 438 9. Duran RV, Oppliger W, Robitaille AM, Heiserich L, Skendaj R, Gottlieb E, Hall MN.  
439 2012. Glutaminolysis activates Rag-mTORC1 signaling. *Mol Cell* 47:349-58.
- 440 10. Clippinger AJ, Maguire TG, Alwine JC. 2011. Human cytomegalovirus infection  
441 maintains mTOR activity and its perinuclear localization during amino acid  
442 deprivation. *J Virol* 85:9369-76.
- 443 11. Umashankar M, Petrucelli A, Cicchini L, Caposio P, Kreklywich CN, Rak M, Bughio  
444 F, Goldman DC, Hamlin KL, Nelson JA, Fleming WH, Streblow DN, Goodrum F.  
445 2011. A novel human cytomegalovirus locus modulates cell type-specific outcomes of  
446 infection. *PLoS Pathog* 7:e1002444.
- 447 12. Lin YT, Prendergast J, Grey F. 2017. The host ubiquitin-dependent segregase  
448 VCP/p97 is required for the onset of human cytomegalovirus replication. *PLoS*  
449 *Pathog* 13:e1006329.
- 450 13. McCormick D, Lin YT, Grey F. 2018. Identification of Host Factors Involved in  
451 Human Cytomegalovirus Replication, Assembly, and Egress Using a Two-Step Small  
452 Interfering RNA Screen. *MBio* 9.
- 453 14. Szklarczyk D, Gable AL, Lyon D, Junge A, Wyder S, Huerta-Cepas J, Simonovic M,  
454 Doncheva NT, Morris JH, Bork P, Jensen LJ, Mering CV. 2019. STRING v11:  
455 protein-protein association networks with increased coverage, supporting functional  
456 discovery in genome-wide experimental datasets. *Nucleic Acids Res* 47:D607-D613.
- 457 15. Griffiths SJ, Koegl M, Boutell C, Zenner HL, Crump CM, Pica F, Gonzalez O,  
458 Friedel CC, Barry G, Martin K, Craigmiles MH, Chen R, Kaza LN, Fossum E,

- 459 Fazakerley JK, Efstathiou S, Volpi A, Zimmer R, Ghazal P, Haas J. 2013. A  
460 systematic analysis of host factors reveals a Med23-interferon-lambda regulatory axis  
461 against herpes simplex virus type 1 replication. *PLoS Pathog* 9:e1003514.
- 462 16. Everett RD. 1999. A surprising role for the proteasome in the regulation of  
463 herpesvirus infection. *Trends Biochem Sci* 24:293-5.
- 464 17. He X, Zhang P. 2015. Serine/arginine-rich splicing factor 3 (SRSF3) regulates  
465 homologous recombination-mediated DNA repair. *Mol Cancer* 14:158.
- 466 18. Wang Z, Liu Q, Lu J, Fan P, Xie W, Qiu W, Wang F, Hu G, Zhang Y. 2016.  
467 Serine/Arginine-rich Splicing Factor 2 Modulates Herpes Simplex Virus Type 1  
468 Replication via Regulating Viral Gene Transcriptional Activity and Pre-mRNA  
469 Splicing. *J Biol Chem* 291:26377-26387.
- 470 19. Gan J, Qiao N, Strahan R, Zhu C, Liu L, Verma SC, Wei F, Cai Q. 2016.  
471 Manipulation of ubiquitin/SUMO pathways in human herpesviruses infection. *Rev*  
472 *Med Virol* 26:435-445.
- 473 20. Krall AS, Xu S, Graeber TG, Braas D, Christofk HR. 2016. Asparagine promotes  
474 cancer cell proliferation through use as an amino acid exchange factor. *Nat Commun*  
475 7:11457.
- 476 21. Pant A, Cao S, Yang Z. 2019. Asparagine Is a Critical Limiting Metabolite for  
477 Vaccinia Virus Protein Synthesis during Glutamine Deprivation. *J Virol* 93.
- 478 22. Meijer AJ, Lorin S, Blommaert EF, Codogno P. 2015. Regulation of autophagy by  
479 amino acids and MTOR-dependent signal transduction. *Amino Acids* 47:2037-63.
- 480 23. Jewell JL, Russell RC, Guan KL. 2013. Amino acid signalling upstream of mTOR.  
481 *Nat Rev Mol Cell Biol* 14:133-9.
- 482 24. Kimball SR, Jefferson LS. 2006. Signaling pathways and molecular mechanisms  
483 through which branched-chain amino acids mediate translational control of protein  
484 synthesis. *J Nutr* 136:227S-31S.



- 485 25. Gong SS, Basilico C. 1990. A mammalian temperature-sensitive mutation affecting  
486 G1 progression results from a single amino acid substitution in asparagine synthetase.  
487 *Nucleic Acids Res* 18:3509-13.
- 488 26. Lu M, Shenk T. 1996. Human cytomegalovirus infection inhibits cell cycle  
489 progression at multiple points, including the transition from G1 to S. *J Virol* 70:8850-  
490 7.
- 491 27. Salvant BS, Fortunato EA, Spector DH. 1998. Cell cycle dysregulation by human  
492 cytomegalovirus: influence of the cell cycle phase at the time of infection and effects  
493 on cyclin transcription. *J Virol* 72:3729-41.
- 494 28. Knott SRV, Wagenblast E, Khan S, Kim SY, Soto M, Wagner M, Turgeon MO, Fish  
495 L, Erard N, Gable AL, Maceli AR, Dickopf S, Papachristou EK, D'Santos CS, Carey  
496 LA, Wilkinson JE, Harrell JC, Perou CM, Goodarzi H, Poulogiannis G, Hannon GJ.  
497 2018. Asparagine bioavailability governs metastasis in a model of breast cancer.  
498 *Nature* 554:378-381.
- 499 29. Lomelino CL, Andring JT, McKenna R, Kilberg MS. 2017. Asparagine synthetase:  
500 Function, structure, and role in disease. *J Biol Chem* 292:19952-19958.
- 501 30. Griffiths SJ. 2013. Screening for Host Proteins with Pro- and Antiviral Activity Using  
502 High-Throughput RNAi. *Virus-Host Interactions: Methods and Protocols* 1064:71-90.

503

## 504 **Figure Legends**

505 **Figure 1. High-throughput siRNA screen identified novel host factors for HCMV**  
506 **replication.** (A) NHDF cells were transfected with siRNA pools targeting 6,881 genes in a  
507 384 well format.. Two days post transfection the cells were infected with HCMV TB40/E-GFP  
508 at an MOI of five with GFP levels monitored by plate cytometry for seven days. Comparative  
509 analysis between three biological repeats showed high levels of correlation with Pearson  
510 coefficient scores between 0.83 – 0.85. (B) Relative GFP expression representing the level of  
511 primary replication is shown, sorted from low to high compared to control non-targeting siRNA  
512 transfected cells. Standard deviations are shown in grey error bars. (C) Volcano plot showing  
513 relative GFP expression versus associated P-value. Each dot represents knockdown of a single

514 gene. P-values were calculated by student's *t*-tests. Red boxes represent the top hits based on a  
515 two-fold increase or decrease in relative GFP expression (listed in supplemental table 2 and 3).

516 **Figure 2. Functional analyses of top proviral and antiviral candidates.** Selected candidates  
517 of the top 115 host factors are shown in functional clusters based on STRING analysis.  
518 Interactions between genes all have high interaction score (combined score >0.8, STRING).  
519 Genes that do not show an interaction with other genes in this figure are depicted as diamonds.  
520 Functional gene clusters are shown in their approximate cellular location with the primary  
521 replication ratio compared to negative control indicated (green indicates antiviral role, red  
522 indicates proviral role).

523 **Figure 3. Asparagine synthetase (ASNS) is a novel host factor for HCMV replication.**  
524 NHDF cells were transfected with an siRNA pool targeting ASNS or a scrambled negative  
525 control and infected 48 hours post-transfection with HCMV TB40/E-GFP at an MOI of 5. (A)  
526 Knockdown of ASNS substantially decreased virus replication throughout the course of  
527 infection.  $n = 3$ ; error bars show standard deviations. Two-way ANOVA was used to calculate  
528 statistical significance. \*\*\* =  $p < 0.0005$ . (B) CellTiter-Blue assay was performed at 7 day  
529 post-infection (DPI) and cell viability was calculated.  $n = 3$ ; error bars show standard deviations.  
530 (C) Cell-free (supernatant) and cell-associated virus (cells) were harvested at indicated time  
531 points, and virus levels determined by plaque assay.  $n = 2$ ; error bars represent standard error  
532 of the mean. Two-way ANOVA was used to calculate statistical significance. \* =  $p < 0.05$ . (D)  
533 NHDF cells were transfected with the 4 individual siRNAs targeting ASNS or a scrambled  
534 sequence (Neg control) and infected 48 hours post-transfection with TB40/E-GFP at an MOI  
535 of 5. GFP levels were measured at 7 DPI to determine the effect of gene depletion on primary  
536 replication.  $n = 3$ ; error bars represent standard deviations. One-way ANOVA was used to  
537 calculate statistical significance between individual siRNA and the negative control. \*\* =  $p <$   
538  $0.005$ . (E) Western blot analysis showed ASNS protein levels following knockdown with  
539 individual siRNA (1-4) and pool, along with negative control. Protein lysates were collected 4  
540 DPI.

541 **Figure 4. Knockdown of ASNS reduced IE2 expression and viral DNA amplification.**  
542 NHDF cells were transfected with siRNA pool targeting ASNS (siASNS) or a scrambled  
543 negative control siRNA (siNeg), followed by infection 48 hours post-transfection with  
544 TB40/E-GFP at an MOI of 5. (A) Fluorescence images were taken at 1 DPI with 100X  
545 magnification. White bar = 100  $\mu$ m. (B) Total protein was harvested at indicated time points

546 and levels of immediate-early (IE1/2), early (pp52) and late (pp28) proteins were detected by  
547 western blot analysis. (C) Quantification of western blot data from figure B. The relative  
548 intensity of each band was normalised to  $\beta$ -actin compared to siNeg at day 1. Bars in each gene  
549 represent the differential expressions from 1 to 7 DPI (left to right).  $n = 2$  (D) Total genomic  
550 DNA was isolated at indicated time points, and viral genome levels were determined by qPCR.  
551  $n = 2$ ; error bars show standard errors of mean. Two-way ANOVA was used to calculate  
552 statistical significance. \* =  $p < 0.05$ .

553 **Figure 5. Inhibition of HCMV following ASNS knockdown is not due to loss of protein**  
554 **translation.** (A) NHDF cells were transfected with siRNA pool targeting ASNS (siASNS) or  
555 a scrambled negative control siRNA (siNeg), then infected 48 hours post-transfection with  
556 HCMV TB40/E-GFP at an MOI of 5. Cells were treated with puromycin at indicated times.  
557 Global protein translation levels were quantified based on puromycin incorporation by western  
558 blot analysis (B) Quantification of western blot data from figure 5A. The relative intensity of  
559 each band was normalised to  $\beta$ -actin compared to siNeg at day 0. NHDF cells were transfected  
560 as above then infected with HSV-1 (C) or IAV (D) at an MOI of 0.1. Cells were harvested at  
561 the indicated times and virus levels quantified by plaque assay,  $n=3$ , error bars show standard  
562 deviation.

563 **Figure 6. Asparagine depletion did not reduce mTOR signalling during HCMV**  
564 **replication.** (A) A schematic diagram of host cell metabolism involving glycolysis, TCA cycle  
565 and asparagine biosynthesis. Glucose is metabolised via glycolysis to produce acetyl-CoA  
566 which enters the tricarboxylic acid (TCA) cycle (also known as Krebs cycle). Glutamine is  
567 metabolised to glutamate, which can be further reduced to make  $\alpha$ -ketoglutarate replenishing  
568 the TCA cycle. Generation of Asparagine requires conversion of glutamine to glutamate. (B)  
569 NHDF cells were transfected with siRNA against ASNS (siASNS) or a scrambled control  
570 sequence (siNeg), followed by infection 48 hours post-transfection with HCMV TB40/E-GFP  
571 at an MOI of 5. Total protein was harvested at indicated time points. Levels of phosphorylated  
572 p70 S6K (P-p70 S6K), p70 S6K, immediate-early (IE1/2), early (pp52) and late (pp28) proteins  
573 were determined by western blot analysis.  $\beta$ -actin was used as a loading control.

574 **Figure 7. Asparagine supplementation partially rescued HCMV replication in glutamine**  
575 **depleted cells.** NHDF cells were grown in media with or without glutamine (Q) and asparagine  
576 (N) and infected with HCMV TB40/E-GFP at an MOI of 5 with indicated conditions. GFP

577 fluorescence was monitored every 24 hours for 7 days.  $n = 3$ ; error bars show standard  
578 deviations. Two-way ANOVA was used to calculate statistical significance. \* =  $p < 0.05$

579 **Figure 8. Asparagine deprivation established a reversible inhibition of HCMV infection.**

580 NHDF cells were transfected with siRNA pool targeting ASNS (siASNS) or a scrambled  
581 negative control siRNA (siNeg), followed by infection 48 hours post-transfection with  
582 TB40/E-GFP at an MOI of 5. (A) 0.1 mM of asparagine was supplemented in the medium  
583 either at the time of transfection (48H prior to infection) or at the time of infection with primary  
584 replication measured at seven days post infection based on GFP expression. (B) 0.1 mM of  
585 asparagine was added at indicated time points and GFP fluorescence was monitored every 24  
586 hours for 12 days.  $n = 3$ ; error bars showed standard deviations. n.s. = non-significant. \* =  $p <$   
587 0.05

588 **Table 1. siRNA deconvolution validation of nine proviral candidates.** Nine proviral

589 candidates were selected for validation with deconvoluted siRNAs. 4 individual siRNAs  
590 targeting different regions of each gene were used to transfect NHDF cells, followed by  
591 infection 48 hours post-transfection with HCMV TB40/E-GFP at an MOI of 5. The number of  
592 deconvoluted siRNAs that showed the same phenotype as the pool is shown. Individual siRNA  
593 was considered validated when knockdown led to significant inhibition of virus replication.  
594 Std. Dev. = standard deviation;  $n = 3$

595

**A**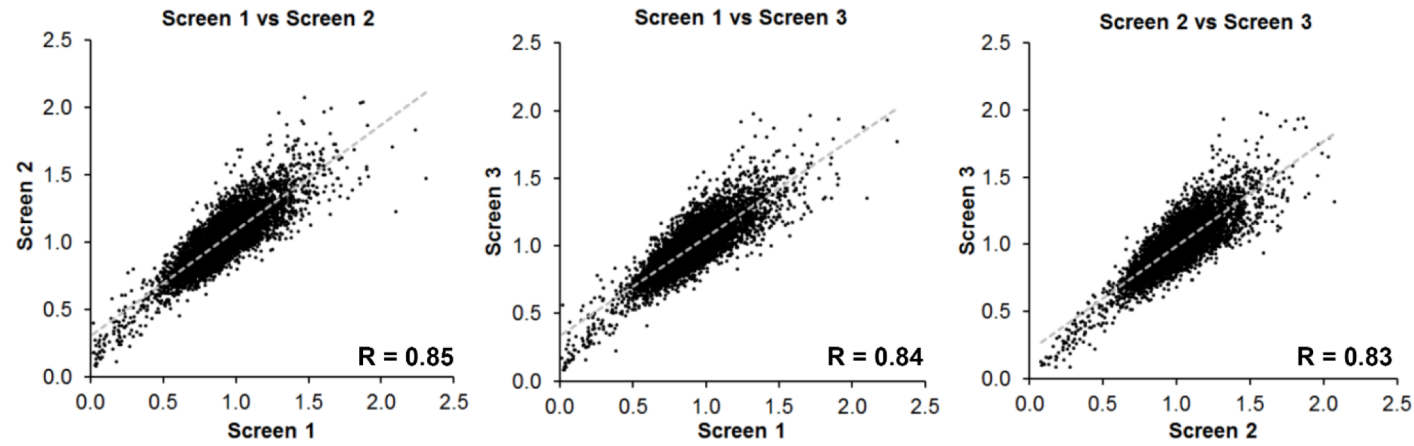**B**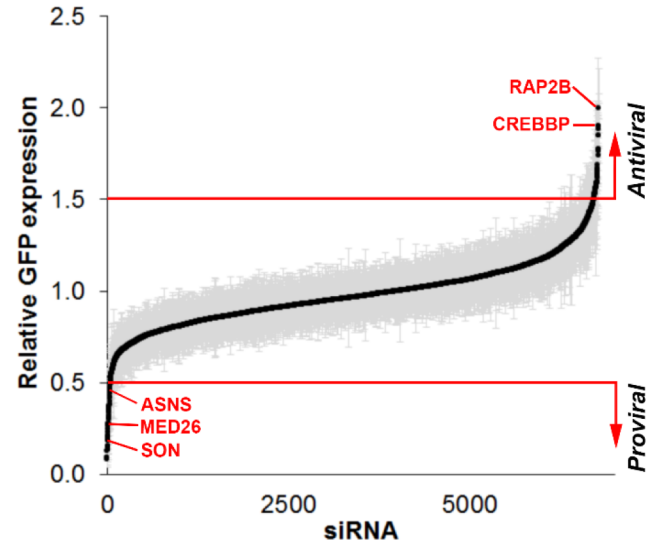**C**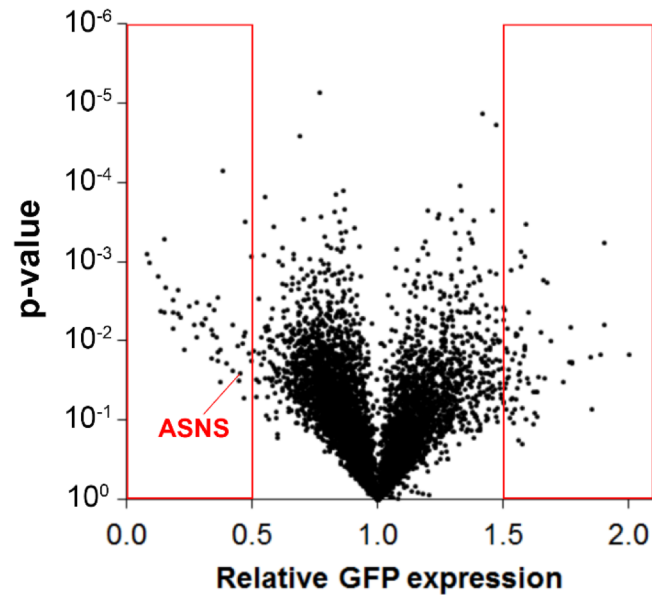

**Figure 1. High-throughput siRNA screen identified novel host factors for HCMV replication.** (A) NHDF cells were transfected with siRNA pools targeting 6,881 genes in a 384 well format. Two days post transfection the cells were infected with HCMV TB40/E-GFP at an MOI of five with GFP levels monitored by plate cytometry for seven days. Comparative analysis between three biological repeats showed high levels of correlation with Pearson coefficient scores between 0.83 – 0.85. (B) Relative GFP expression representing the level of primary replication is shown, sorted from low to high compared to control non-targeting siRNA transfected cells. Standard deviations are shown in grey error bars. (C) Volcano plot showing relative GFP expression versus associated P-value. Each dot represents knockdown of a single gene. P-values were calculated by student's *t*-tests. Red boxes represent the top hits based on a two-fold increase or decrease in relative GFP expression (listed in supplemental table 2 and 3).

**Extracellular space**

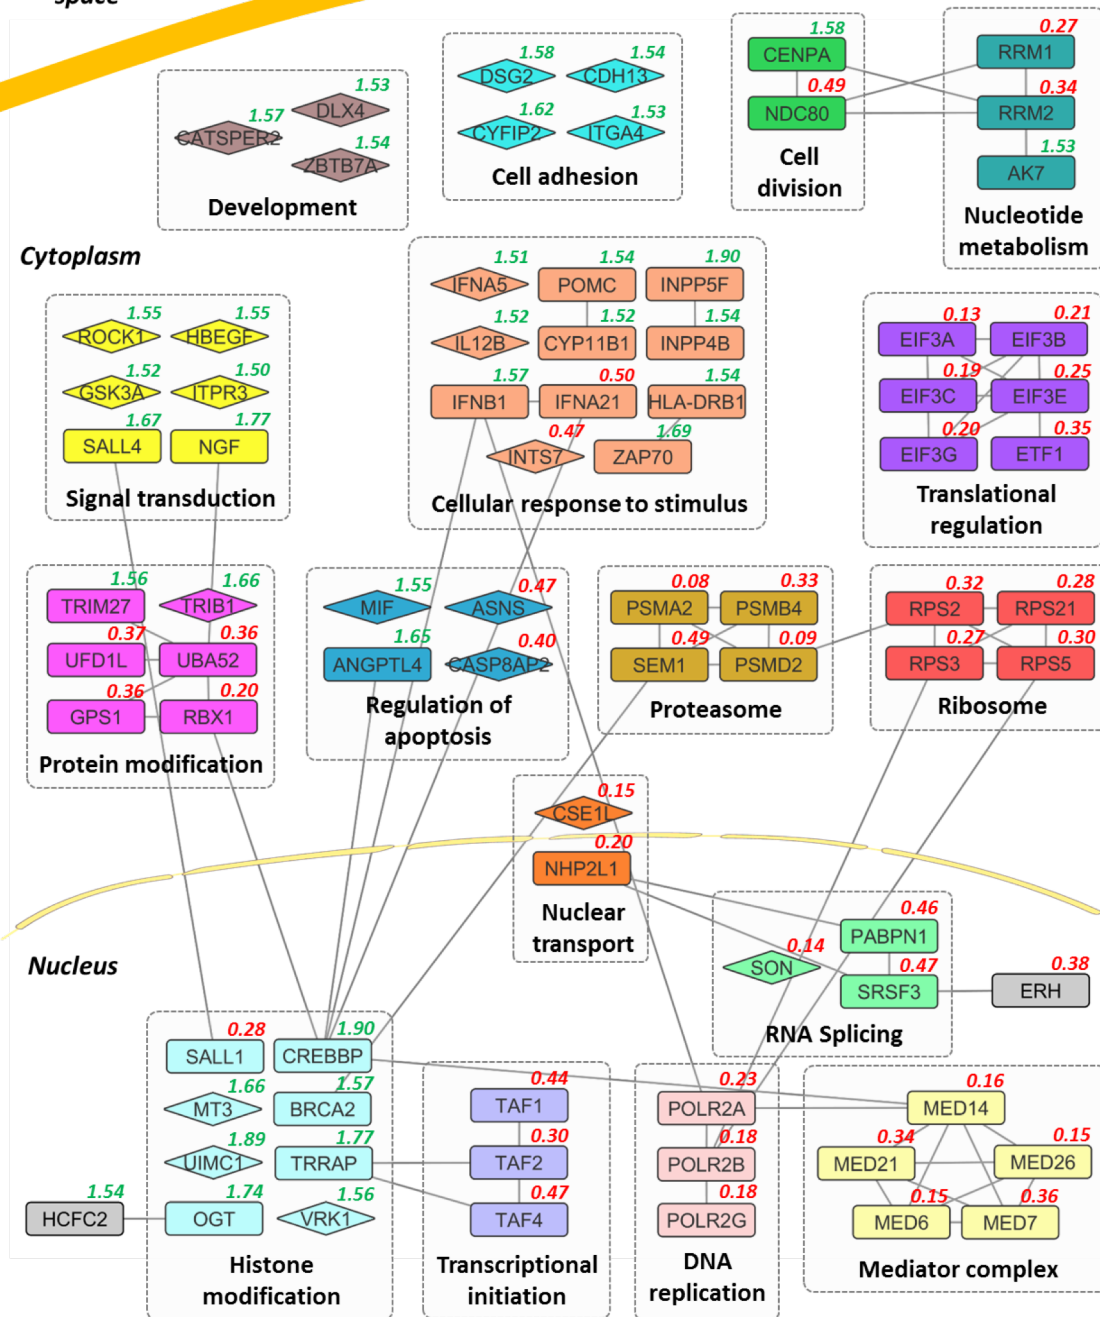

**Figure 2. Functional analyses of top proviral and antiviral candidates.** Selected candidates of the top 115 host factors are shown in functional clusters based on STRING analysis. Interactions between genes all have high interaction score (combined score >0.8, STRING). Genes that do not show an interaction with other genes in this figure are depicted as diamonds. Functional gene clusters are shown in their approximate cellular location with the primary replication ratio compared to negative control indicated (green indicates antiviral role, red indicates proviral role).

| Gene symbol | Mean Ratio to siNeg |                 | Std. Dev.   |                 | siRNA deconvolution (out of 4) | Description                                                           |
|-------------|---------------------|-----------------|-------------|-----------------|--------------------------------|-----------------------------------------------------------------------|
|             | Screen pool         | Validation pool | Screen pool | Validation pool |                                |                                                                       |
| SON         | 0.14                | 0.09            | 0.10        | 0.02            | 4                              | SON DNA binding protein                                               |
| CSE1L       | 0.15                | 0.16            | 0.03        | 0.02            | 3                              | CSE1 chromosome segregation 1-like (yeast)                            |
| SNU13       | 0.20                | 0.11            | 0.09        | 0.01            | 4                              | NHP2 non-histone chromosome protein 2-like 1 ( <i>S. cerevisiae</i> ) |
| GPS1        | 0.36                | 0.40            | 0.15        | 0.04            | 1                              | G protein pathway suppressor 1                                        |
| UBA52       | 0.36                | 0.48            | 0.06        | 0.08            | 3                              | Ubiquitin A-52 residue ribosomal protein fusion product 1             |
| ERH         | 0.38                | 0.45            | 0.01        | 0.05            | 3                              | Enhancer of rudimentary homolog ( <i>Drosophila</i> )                 |
| PABPN1      | 0.46                | 0.50            | 0.10        | 0.08            | 3                              | Poly(A) binding protein, nuclear 1                                    |
| ASNS        | 0.47                | 0.18            | 0.22        | 0.02            | 3                              | Asparagine synthetase                                                 |
| SEM1        | 0.49                | 0.64            | 0.03        | 0.04            | 4                              | Split hand/foot malformation (ectrodactyly) type 1                    |

**Table 1. siRNA deconvolution validation of nine proviral candidates.**

Nine proviral candidates were selected for validation with deconvoluted siRNAs. 4 individual siRNAs targeting different regions of each gene were used to transfect NHDF cells, followed by infection 48 hours post-transfection with HCMV TB40/E-GFP at an MOI of 5. The number of deconvoluted siRNAs that showed the same phenotype as the pool is shown. Individual siRNA was considered validated when knockdown led to significant inhibition of virus replication. Std. Dev. = standard deviation;  $n = 3$

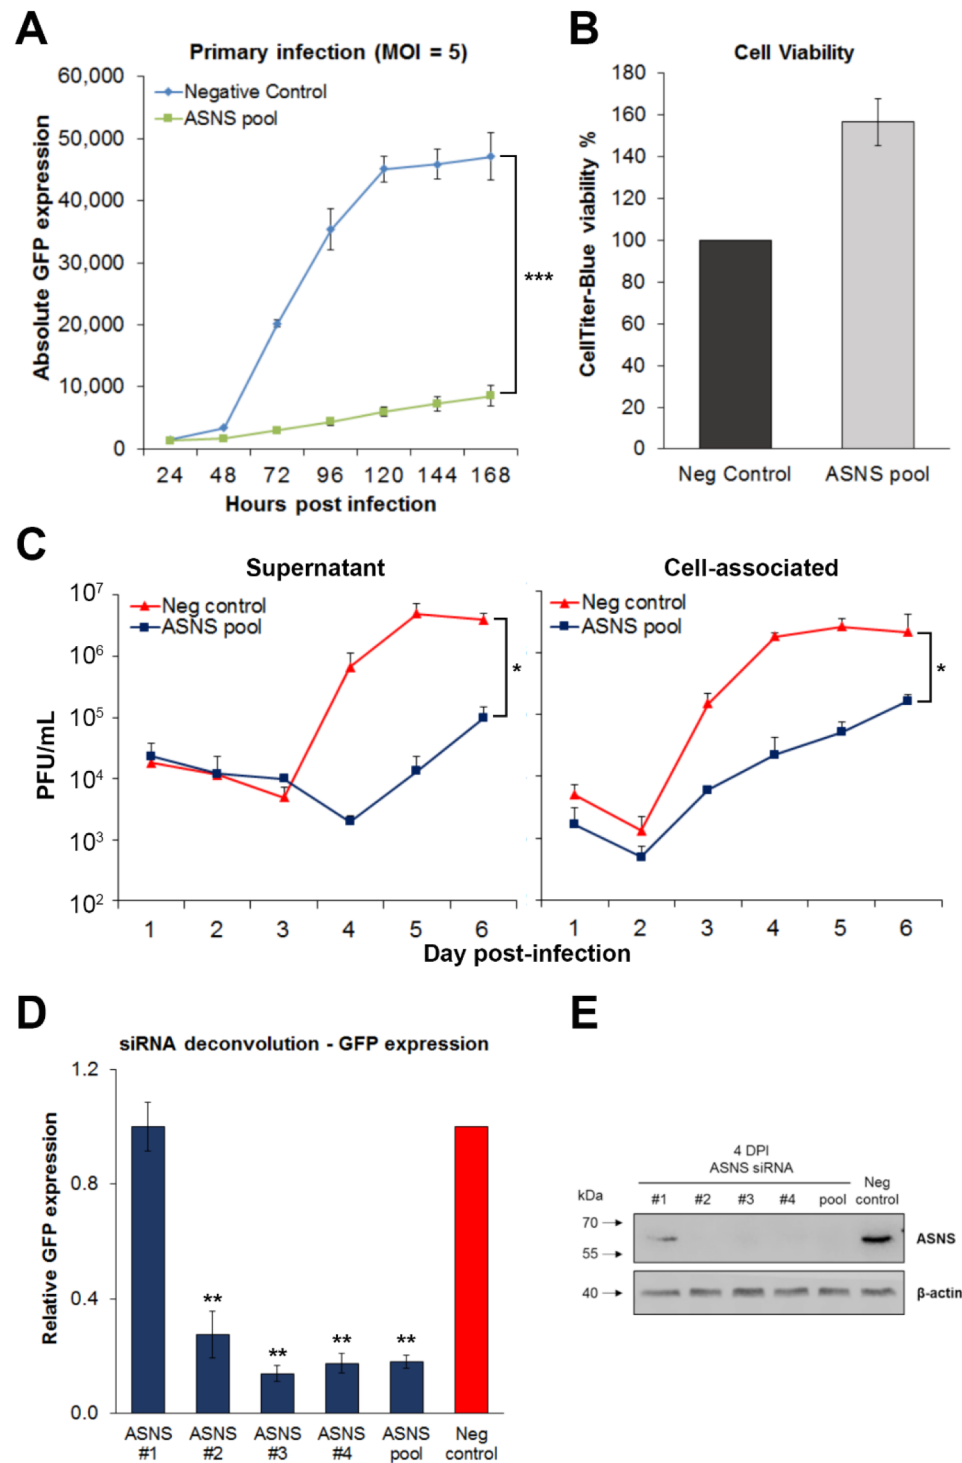

**Figure 3. Asparagine synthetase (ASNS) is a novel host factor for HCMV replication.** NHDF cells were transfected with an siRNA pool targeting ASNS or a scrambled negative control and infected 48 hours post-transfection with HCMV TB40/E-GFP at an MOI of 5. (A) Knockdown of ASNS substantially decreased virus replication throughout the course of infection.  $n = 3$ ; error bars show standard deviations. Two-way ANOVA was used to calculate statistical significance. \*\*\* =  $p < 0.0005$ . (B) CellTiter-Blue assay was performed at 7 day post-infection (DPI) and cell viability was calculated.  $n = 3$ ; error bars show standard deviations. (C) Cell-free (supernatant) and cell-associated virus (cells) were harvested at indicated time points, and virus levels determined by plaque assay.  $n = 2$ ; error bars represent standard error of the mean. Two-way ANOVA was used to calculate statistical significance. \* =  $p < 0.05$ . (D) NHDF cells were transfected with the 4 individual siRNAs targeting ASNS or a scrambled sequence (Neg control) and infected 48 hours post-transfection with TB40/E-GFP at an MOI of 5. GFP levels were measured at 7 DPI to determine the effect of gene depletion on primary replication.  $n = 3$ ; error bars represent standard deviations. One-way ANOVA was used to calculate statistical significance between individual siRNA and the negative control. \*\* =  $p < 0.005$ . (E) Western blot analysis showed ASNS protein levels following knockdown with individual siRNA (1-4) and pool, along with negative control. Protein lysates were collected 4 DPI.



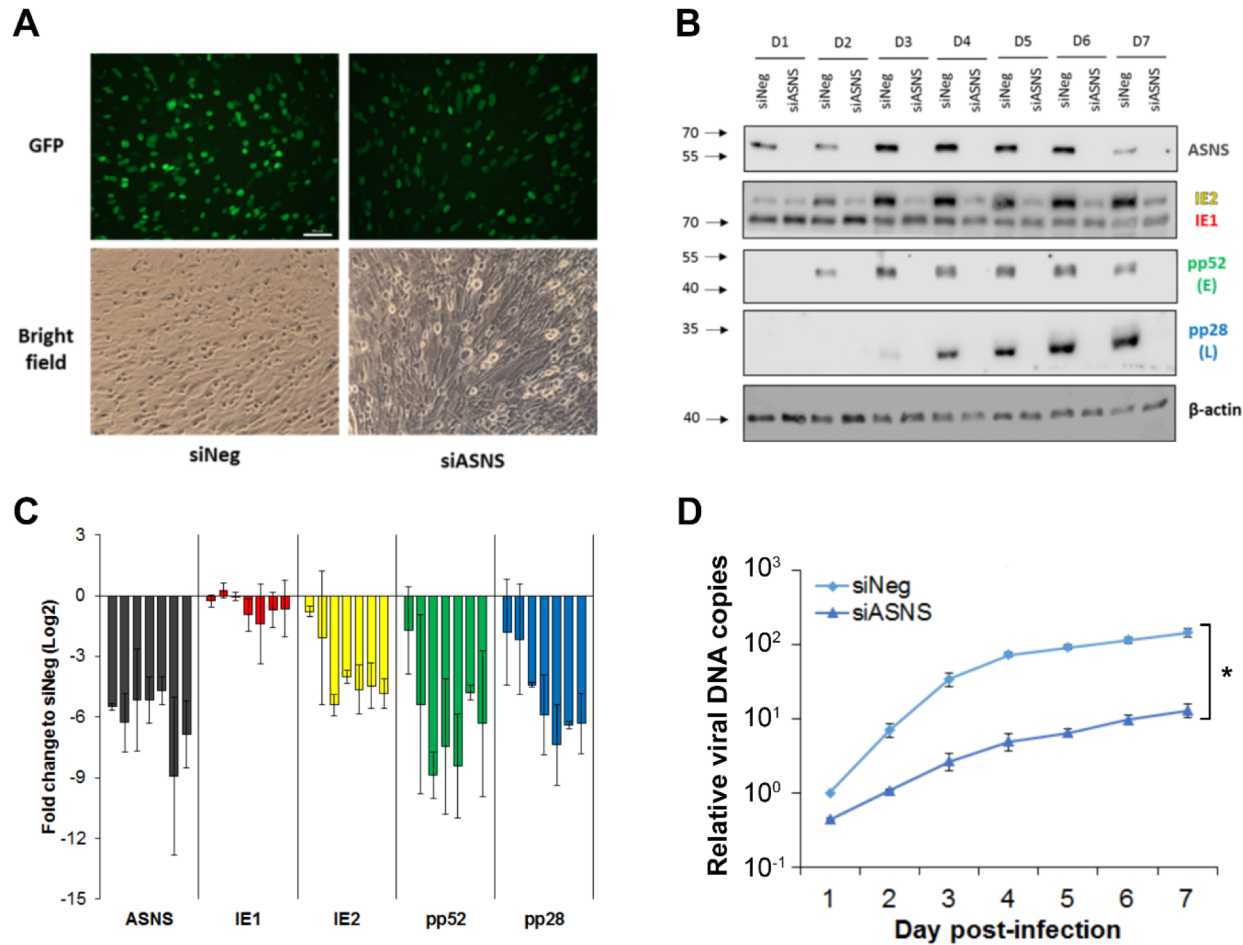

**Figure 4. Knockdown of ASNS reduced IE2 expression and viral DNA amplification.** NHDF cells were transfected with siRNA pool targeting ASNS (siASNS) or a scrambled negative control siRNA (siNeg), followed by infection 48 hours post-transfection with TB40/E-GFP at an MOI of 5. (A) Fluorescence images were taken at 1 DPI with 100X magnification. White bar = 100  $\mu$ m. (B) Total protein was harvested at indicated time points and levels of immediate-early (IE1/2), early (pp52) and late (pp28) proteins were detected by western blot analysis. (C) Quantification of western blot data from figure B. The relative intensity of each band was normalised to  $\beta$ -actin compared to siNeg at day 1. Bars in each gene represent the differential expressions from 1 to 7 DPI (left to right).  $n = 2$  (D) Total genomic DNA was isolated at indicated time points, and viral genome levels were determined by qPCR.  $n = 2$ ; error bars show standard errors of mean. Two-way ANOVA was used to calculate statistical significance. \* =  $p < 0.05$ .

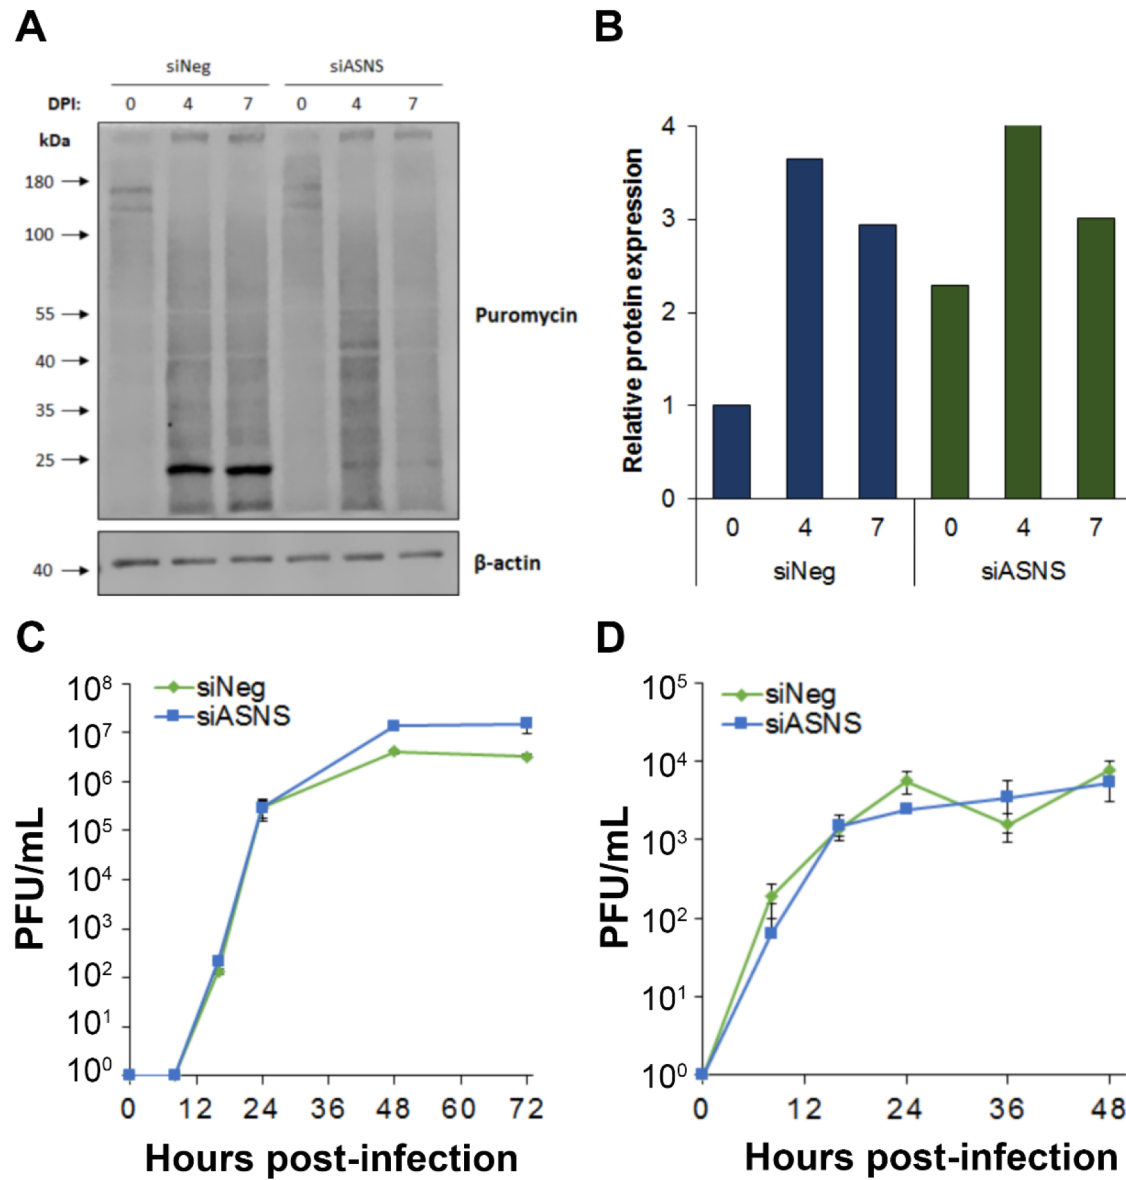

**Figure 5. Inhibition of HCMV following ASNS knockdown is not due to loss of protein translation.** (A) NHDF cells were transfected with siRNA pool targeting ASNS (siASNS) or a scrambled negative control siRNA (siNeg), then infected 48 hours post-transfection with HCMV TB40/E-GFP at an MOI of 5. Cells were treated with puromycin at indicated times. Global protein translation levels were quantified based on puromycin incorporation by western blot analysis (B) Quantification of western blot data from figure 5A. The relative intensity of each band was normalised to  $\beta$ -actin compared to siNeg at day 0. NHDF cells were transfected as above then infected with HSV-1 (C) or IAV (D) at an MOI of 0.1. Cells were harvested at the indicated times and virus levels quantified by plaque assay,  $n=3$ , error bars show standard deviation.

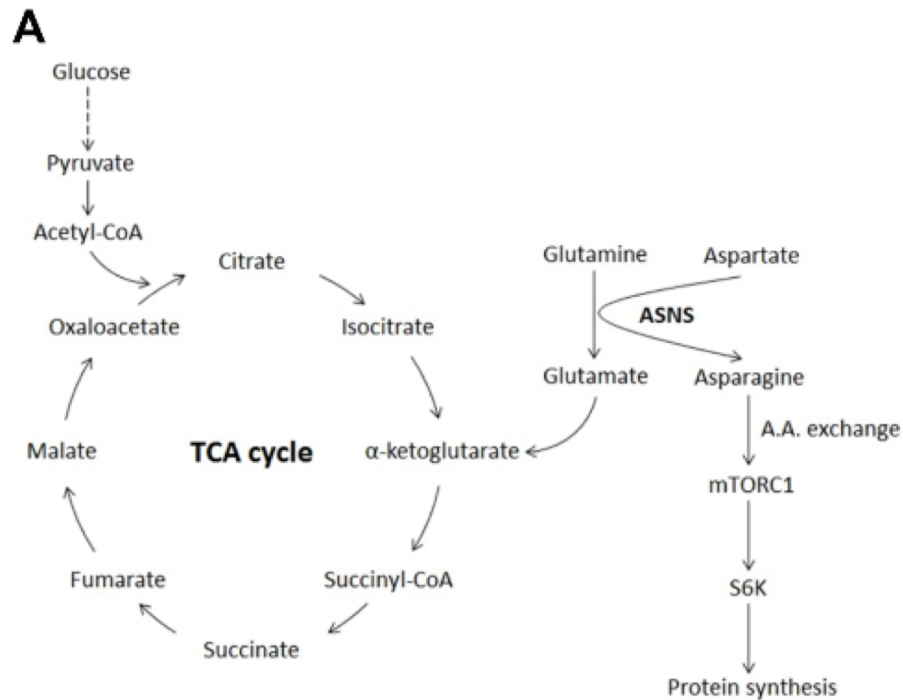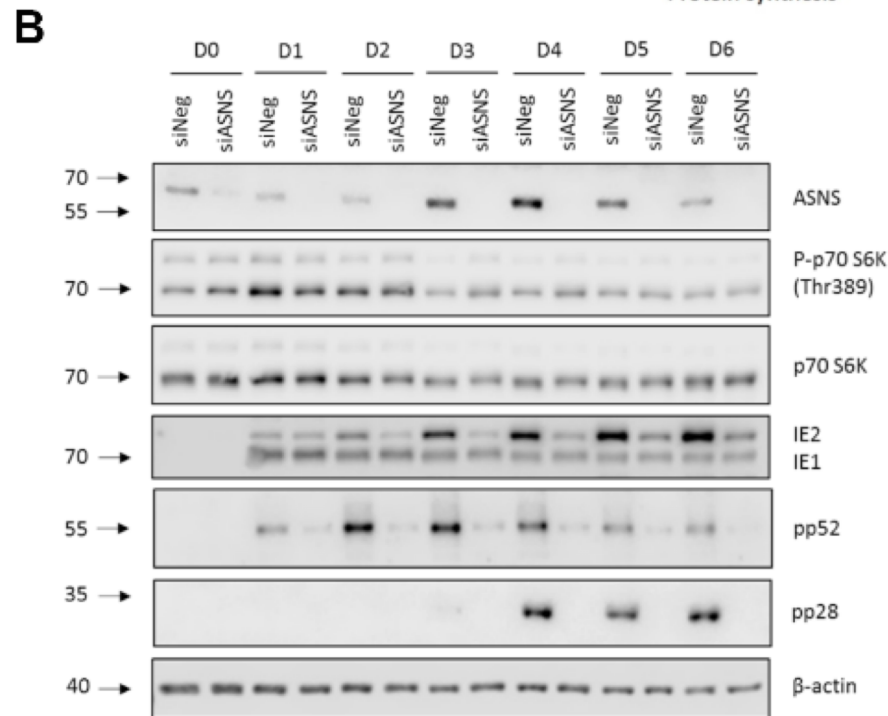

**Figure 6. Asparagine depletion did not reduce mTOR signalling during HCMV replication.** (A) A schematic diagram of host cell metabolism involving glycolysis, TCA cycle and asparagine biosynthesis. Glucose is metabolised via glycolysis to produce acetyl-CoA which enters the tricarboxylic acid (TCA) cycle (also known as Krebs cycle). Glutamine is metabolised to glutamate, which can be further reduced to make  $\alpha$ -ketoglutarate replenishing the TCA cycle. Generation of Asparagine requires conversion of glutamine to glutamate. (B) NHDF cells were transfected with siRNA against ASNS (siASNS) or a scrambled control sequence (siNeg), followed by infection 48 hours post-transfection with HCMV TB40/E-GFP at an MOI of 5. Total protein was harvested at indicated time points. Levels of phosphorylated p70 S6K (P-p70 S6K), p70 S6K, immediate-early (IE1/2), early (pp52) and late (pp28) proteins were determined by western blot analysis.  $\beta$ -actin was used as a loading control.

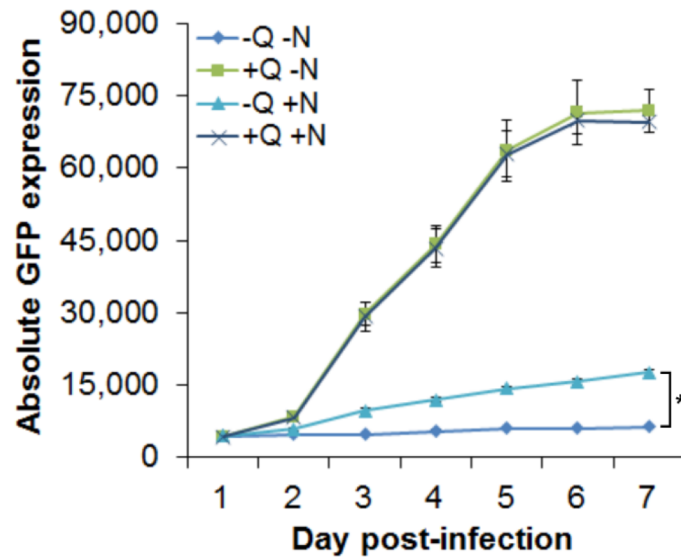

**Figure 7. Asparagine supplementation partially rescued HCMV replication in glutamine depleted cells.** NHDF cells were grown in media with or without glutamine (Q) and asparagine (N) and infected with HCMV TB40/E-GFP at an MOI of 5 with indicated conditions. GFP fluorescence was monitored every 24 hours for 7 days.  $n = 3$ ; error bars show standard deviations. Two-way ANOVA was used to calculate statistical significance. \* =  $p < 0.05$

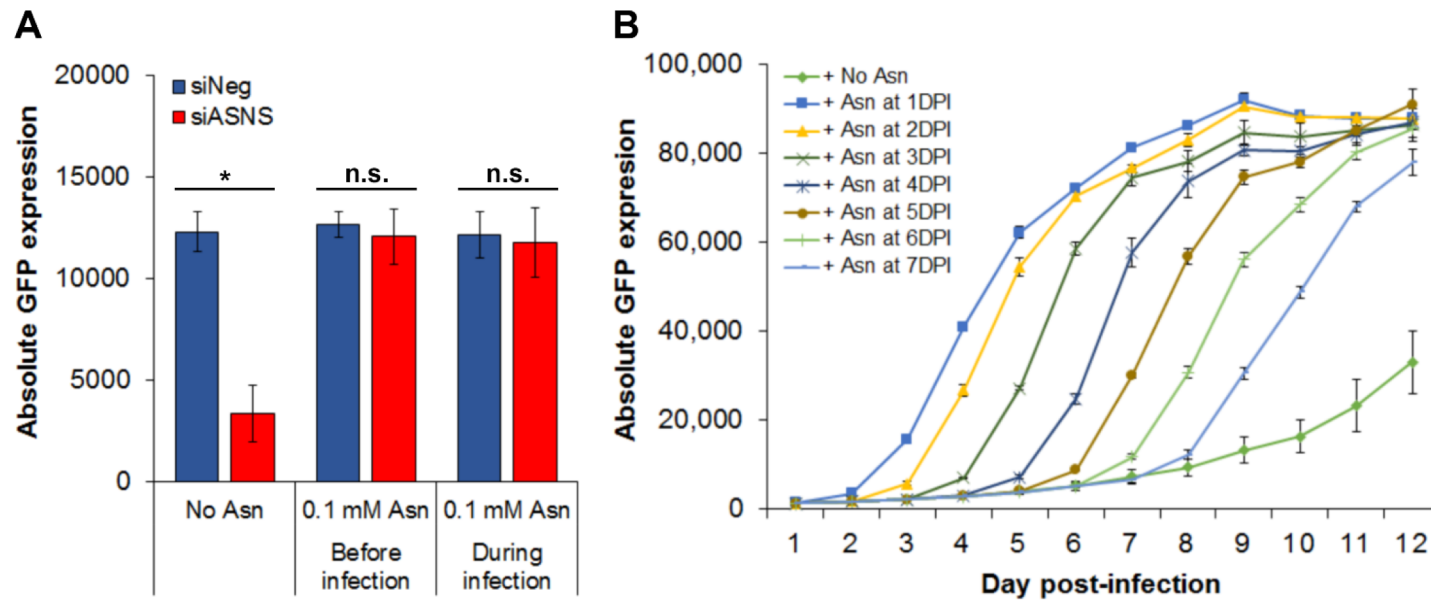

**Figure 8. Asparagine deprivation established a reversible inhibition of HCMV infection.** NHDF cells were transfected with siRNA pool targeting ASNS (siASNS) or a scrambled negative control siRNA (siNeg), followed by infection 48 hours post-transfection with TB40/E-GFP at an MOI of 5. (A) 0.1 mM of asparagine was supplemented in the medium either at the time of transfection (48H prior to infection) or at the time of infection with primary replication measured at seven days post infection based on GFP expression. (B) 0.1 mM of asparagine was added at indicated time points and GFP fluorescence was monitored every 24 hours for 12 days.  $n = 3$ ; error bars showed standard deviations. n.s. = non-significant. \* =  $p < 0.05$
